# Supplementary material for: Macrophage Histone Lactylation Drives Inflammatory Activation in Heart Failure via the IFIT3/JNK Signaling Axis
Source: Research Square preprint supplement (doi:10.21203/rs.3.rs-8830080/v1), 2026-02-19
Supplement: Supplementary file 1 [file a1cdf7c7ffe32fdb3718fb76.docx]

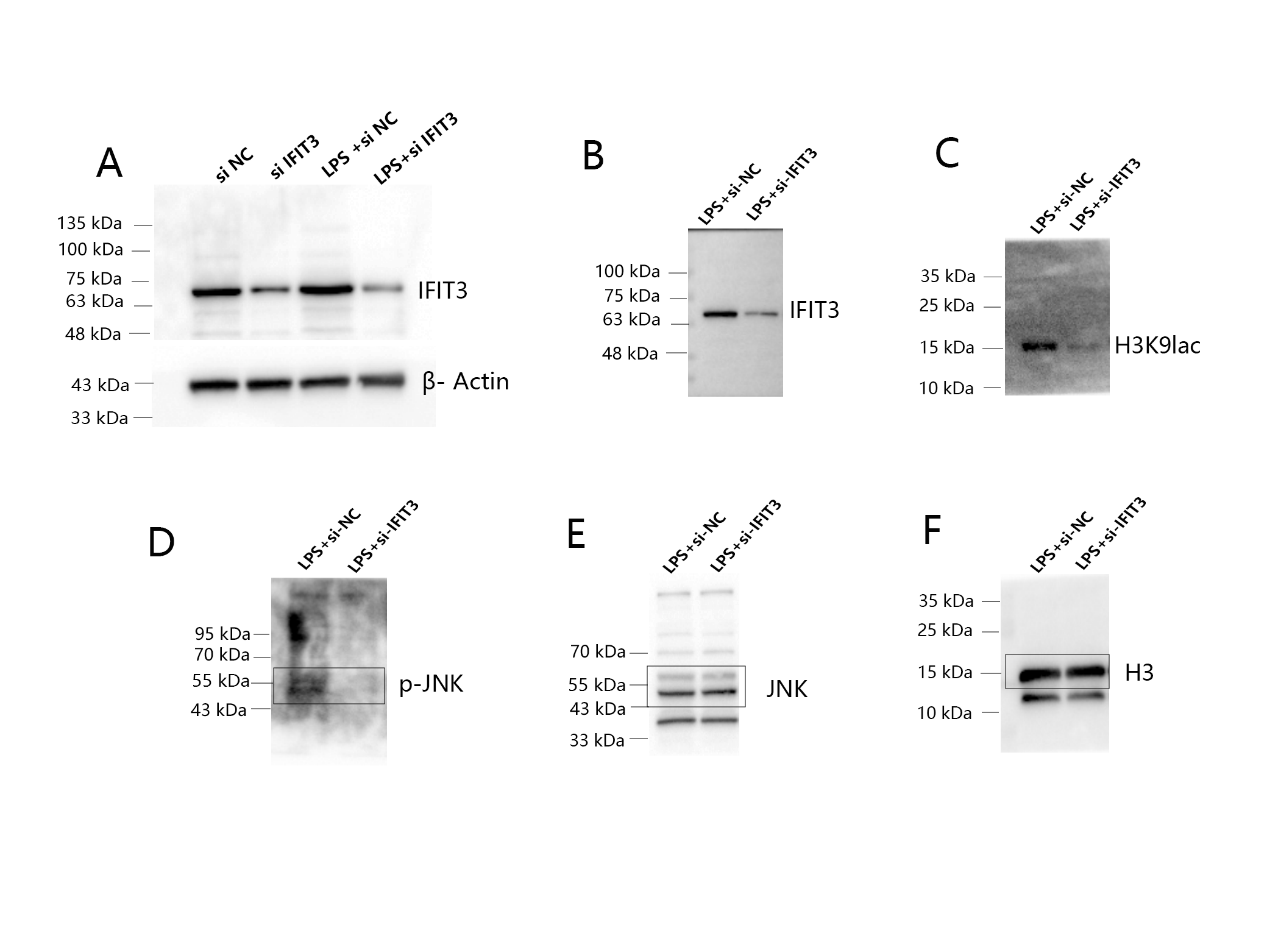
**Figure S1.** Western blot analysis of targeted proteins in different groups of RAW264.7 cells. **A** related to figure 4A, **B-F** related to figure 4C. (Data are representative of n = 3 independent experiments; statistical analysis corresponds to that described in the legend of Figure 4)


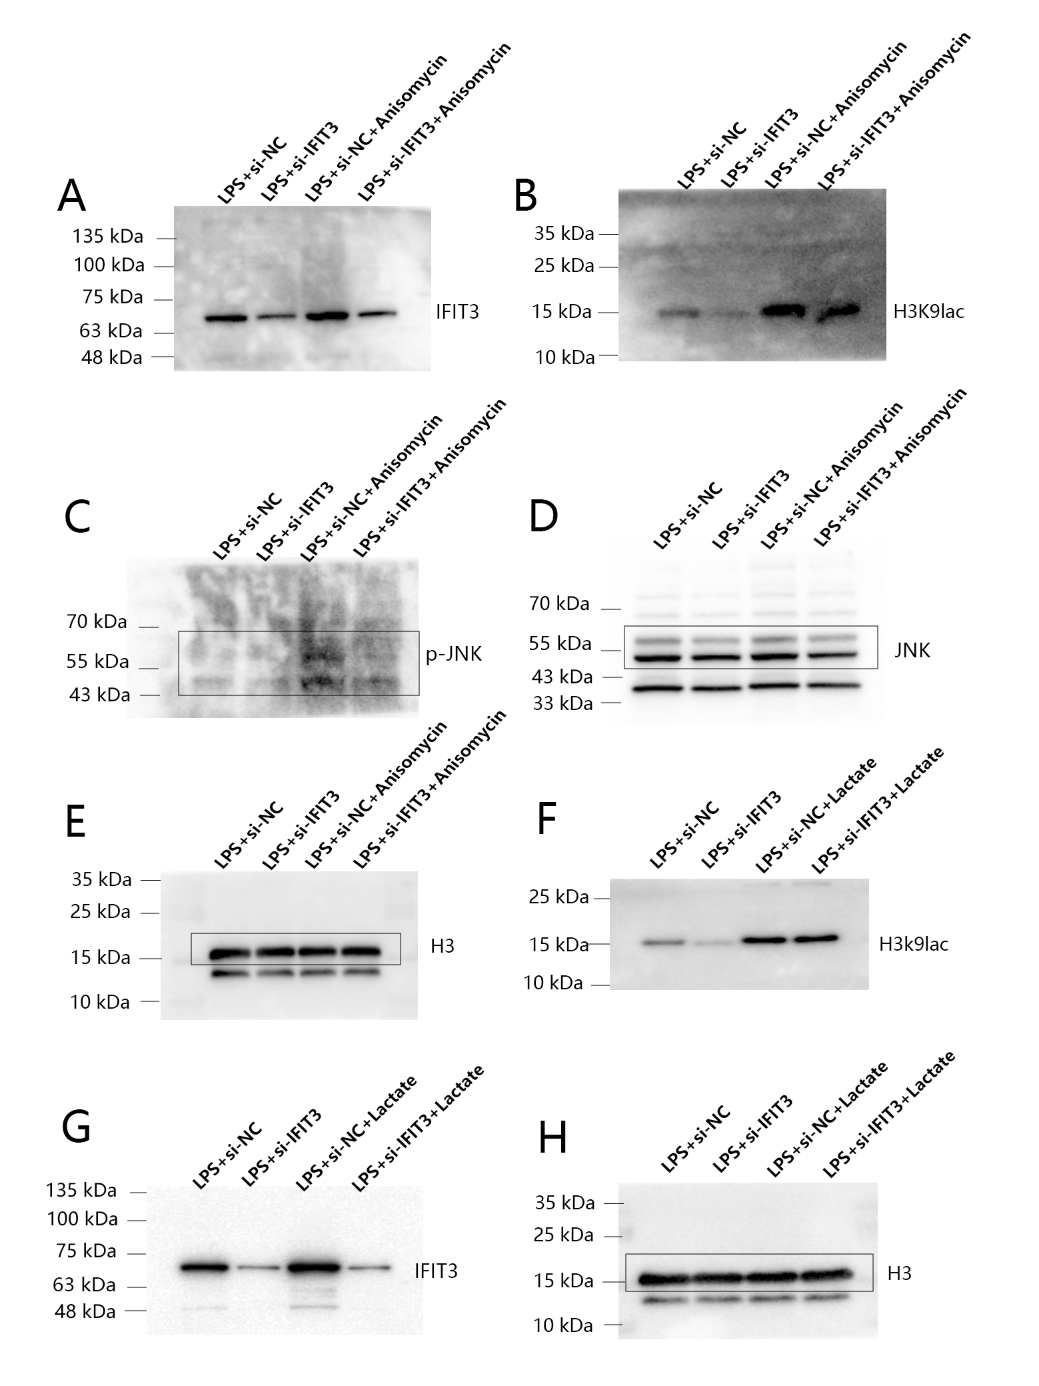


**Figure S2.** Western blot analysis of targeted proteins in different groups of RAW264.7 cells. **A-E** related to figure 5A, **F-H** related to figure 5C. (Data are representative of n = 3 independent experiments; statistical analysis corresponds to that described in the legend of Figure 5)
